# Supplementary material for: A diagnostic and predictive lncRNA lnc-MPEG1-1 promotes the proliferation and metastasis of papillary thyroid cancer cells by occupying miR-766-5p
Source: PubMed Central journal article supplement — Mol Ther Nucleic Acids. 2022 Mar 31;28:408–22. doi: 10.1016/j.omtn.2022.03.023 (PMC9036069; doi:10.1016/j.omtn.2022.03.023), 2022-03-31
Supplement: mmc1.pdf [file mmc1.pdf]

OMTN, Volume 28

## Supplemental information

**A diagnostic and predictive lncRNA *lnc-MPEG1-1*  
promotes the proliferation and metastasis of papillary  
thyroid cancer cells by occupying miR-766-5p**

**Chan Huang, Xuan Su, Da-Lei Zhou, Bo-Heng Xu, Qing Liu, Xiao Zhang, Tao Tang, Xin-Hua Yang, Zu-Lu Ye, and Cai-Yun He**

**Supplementary Table 1 Differentially expressed lncRNAs in the discovery stage**

**Supplementary table 2. Univariate and multivariate logistic regression analysis of the hub lncRNA and other clinicopathological factors for LN metastasis in TCGA cohort**

| Risk factors                            | Univariate analysis |                        | Multivariate analysis |                       |
|-----------------------------------------|---------------------|------------------------|-----------------------|-----------------------|
|                                         | OR(95%CI)           | P value                | OR(95%CI)             | P value               |
| Age                                     | 0.99(0.98–1.00)     | 0.04                   | 0.98(0.96–0.99)       | $2.60 \times 10^{-3}$ |
| T stage                                 |                     |                        |                       |                       |
| T1                                      |                     |                        |                       |                       |
| T2                                      | 1.71(1.05–2.81)     | 0.03                   | 1.96 (1.14–3.40)      | 0.02                  |
| T3                                      | 3.03(1.87–4.97)     | $8.07 \times 10^{-6}$  | 3.37(1.96–5.87)       | $1.33 \times 10^{-5}$ |
| T4                                      | 8.90(3.10–32.24)    | $1.77 \times 10^{-4}$  | 10.43(3.35–40.23)     | $1.60 \times 10^{-4}$ |
| Histological type                       |                     |                        |                       |                       |
| Papillary adenocarcinoma                |                     |                        |                       |                       |
| Papillary carcinoma, columnar cell      | 1.26(0.63–2.60)     | 0.52                   | 0.87(0.40–1.93)       | 0.72                  |
| Papillary carcinoma, follicular variant | 0.17(0.09–0.31)     | $2.47 \times 10^{-8}$  | 0.38(0.18–0.78)       | $9.72 \times 10^{-3}$ |
| lnc-LRRK2-1:1                           |                     |                        |                       |                       |
| Low                                     |                     |                        |                       |                       |
| High                                    | 4.49(2.47–8.67)     | $2.30 \times 10^{-6}$  |                       |                       |
| FAM230B                                 |                     |                        |                       |                       |
| Low                                     |                     |                        |                       |                       |
| High                                    | 3.95(2.28–7.13)     | $2.01 \times 10^{-6}$  |                       |                       |
| lnc-RXRG-1:10                           |                     |                        |                       |                       |
| Low                                     |                     |                        |                       |                       |
| High                                    | 4.44(2.78–7.27)     | $1.01 \times 10^{-9}$  |                       |                       |
| lnc-MPEG1-1:1                           |                     |                        |                       |                       |
| Low                                     |                     |                        |                       |                       |
| High                                    | 4.02(2.71–6.03)     | $8.65 \times 10^{-12}$ | 1.79(1.04–3.09)       | $3.61 \times 10^{-2}$ |
| lnc-ABCA12-5:2                          |                     |                        |                       |                       |
| Low                                     |                     |                        |                       |                       |
| High                                    | 6.26(3.94–10.23)    | $3.80 \times 10^{-14}$ | 2.84(1.51–5.40)       | $1.28 \times 10^{-3}$ |

**Supplementary table 3. The sequences of all primers in RT-qPCR assay**

| ID                 | Sequence (5' - 3')     |
|--------------------|------------------------|
| GAPDH (Forward)    | TGTTTCGTCATGGGTGTGAAC  |
| GAPDH (Reverse)    | ATGGCATGGACTGTGGTCAT   |
| U6 F               | CTCGCTTCGGCAGCACA      |
| U6 R               | AACGCTTCACGAATTTGCGT   |
| Lnc-MPEG1-1 F      | CTCTTCCACTTAATGCCTGTT  |
| Lnc-MPEG1-1 R      | GTTTGAATCCCTGCTCCAC    |
| FAM230B.F          | GCACACCAACCAGTGTAGGA   |
| FAM230B.R          | AGAGTGGGCTGAAGCTTGTC   |
| lnc-RXRG-1:10.F    | AATCCTGGCACTGTTACTT    |
| lnc-RXRG-1:10.R    | CCTTCCCTATGTCTTTCG     |
| LNC-MPEG1-1:1.F    | TCTGAATTCGCTTGCTC      |
| LNC-MPEG1-1:1.R    | AGGTTTGGTGGATGTCTT     |
| lnc-ABCA12-5:2.F   | AGAGCCCGTGCATTCCT      |
| lnc-ABCA12-5:2.R   | TGCCTCTGCTGGTCTTTC     |
| lnc-CENPJ-1:4.F    | CTCCCGGTTCAAGTGATT     |
| lnc-CENPJ-1:4.R    | TCTCCGAGTGCGAGTTTT     |
| LNC-AADAACL2-1:3.F | CTCATAGAAGACCCAGAT     |
| LNC-AADAACL2-1:3.R | GTATTCCCTACAGAACCT     |
| lnc-TCF4-5:18.F    | TCCTCGCCTACTCCACAT     |
| lnc-TCF4-5:18.R    | GTTACGCCATTCTCCTG      |
| lnc-ARHGAP10-2:2.F | TGCTCACCGATCTCTCAATCTG |
| lnc-ARHGAP10-2:2.R | CTGGCCTTGGAACGTCACCTA  |
| lnc-PDLIM3-5:1.F   | CAAAAGCCACTCCGACAACA   |
| lnc-PDLIM3-5:1.R   | TCCTTGGCTCAGACCGAAAT   |
| Fibronectin F      | CGGTGGCTGTCAGTCAAAG    |
| Fibronectin R      | AAACCTCGGCTTCCTCCATAA  |
| ITGB1 F            | CCTACTTCTGCACGATGTGATG |

|                    |                                                  |
|--------------------|--------------------------------------------------|
| ITGB1 R            | CCTTTGCTACGGTTGGTTACATT                          |
| E-cadherin F       | ATTTTTCCCTCGACACCCGAT                            |
| E-cadherin R       | TCCCAGGCGTAGACCAAGA                              |
| Vimentin F         | AGTCCACTGAGTACCGGAGAC                            |
| Vimentin R         | CATTTACGCATCTGGCGTTC                             |
| N-cadherin F       | TGCGGTACAGTGTAAGTGGG                             |
| N-cadherin R       | GAAACCGGGCTATCTGCTCG                             |
| $\beta$ -catenin F | GCAGTTCGCCTTCACTATGG                             |
| $\beta$ -catenin R | ATGTGCACGAACAAGCAACT                             |
| miR-766-5p RT      | CTCAACTGGTGTCGTGGAGTCGGCAATTCAGTTGAGAA<br>GACCAG |
| miR-766-5p F       | ACACTCCAGCTGGGAGGAGGAATTGGTGCTGG                 |
| miR-670-5p RT      | CTCAACTGGTGTCGTGGAGTCGGCAATTCAGTTGAGCA<br>CCACAT |
| miR-670-5p F       | ACACTCCAGCTGGGGTCCCTGAGTGTATGT                   |
| miR-579-3p RT      | CTCAACTGGTGTCGTGGAGTCGGCAATTCAGTTGAGAAT<br>CGCGG |
| miR-579-3p F       | ACACTCCAGCTGGGTTCATTTGGTATAAACCGC                |
| miR-644-3p RT      | CTCAACTGGTGTCGTGGAGTCGGCAATTCAGTTGAGTGT<br>AGGCT |
| miR-644-3p F       | ACACTCCAGCTGGGTTCATTTGCCTCCCAGCC                 |

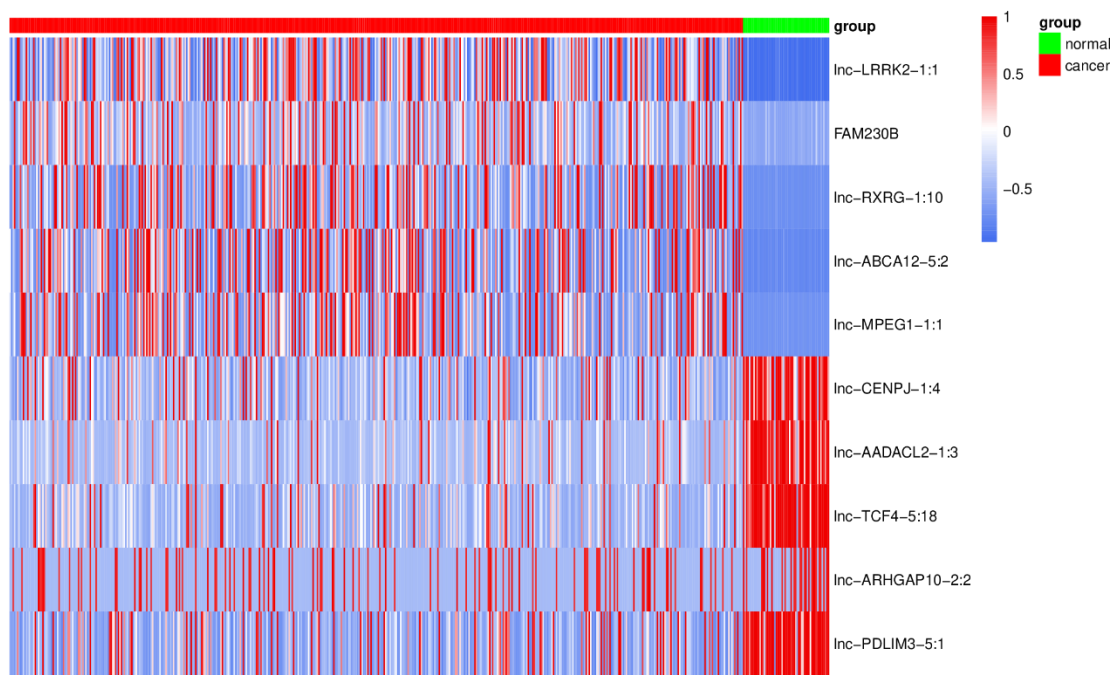

**Supplementary Figure 1 Verification of the ten differential expressed lncRNA in TCGA data**

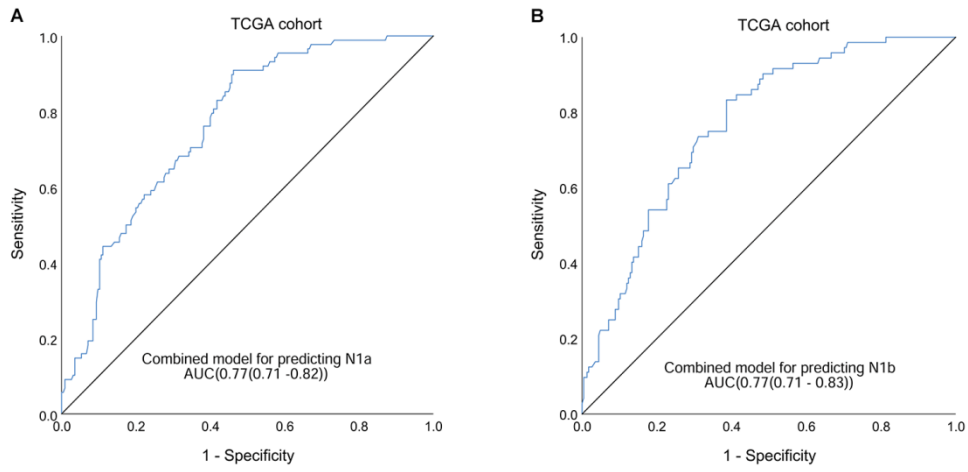

**Supplementary Figure 2 Predictive performance of combined model for lymph node metastasis (N1a and N1b) of papillary thyroid cancer in TCGA data. (A) for N1a; (B) for N1b.**

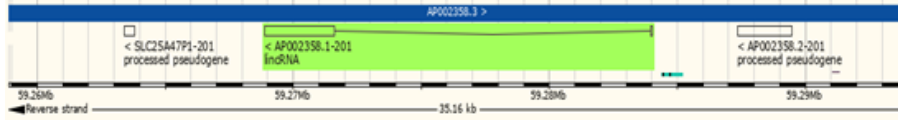

**Supplementary Figure 3 lnc-MPEG1-1:1 is located in the intergenic region of the genome, and there is no coding protein gene upstream and downstream (retrieved from <http://asia.ensembl.org/>; lnc-MPEG1-1:1 (also named ap002358.1-201))**

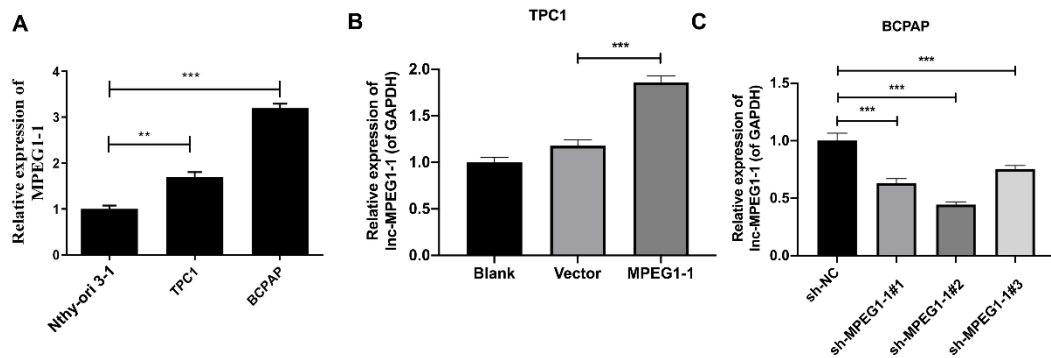

**Supplementary Figure 4 MPEG1-1 was successfully overexpressed and silenced in PTC cells by transfection.** (A) Expression of MPEG1-1 was verified with RT-qPCR analysis in Nthy-ori 3-1 and 2 PTC cell lines (TPC1 and BCPAP). (B) TPC1 cells were transfected with MPEG1-1-overexpressed plasmid or vector (control), and the overexpression effect of MPEG1-1 was determined with RT-qPCR. (C) After transfection with MPEG1-1 shRNAs (sh-MPEG1-1#1, sh-MPEG1-1#2, and sh-MPEG1-1#3), the respective transfection effects were verified through RT-qPCR analysis in BCPAP cells. \*\*\* $P < 0.001$ .



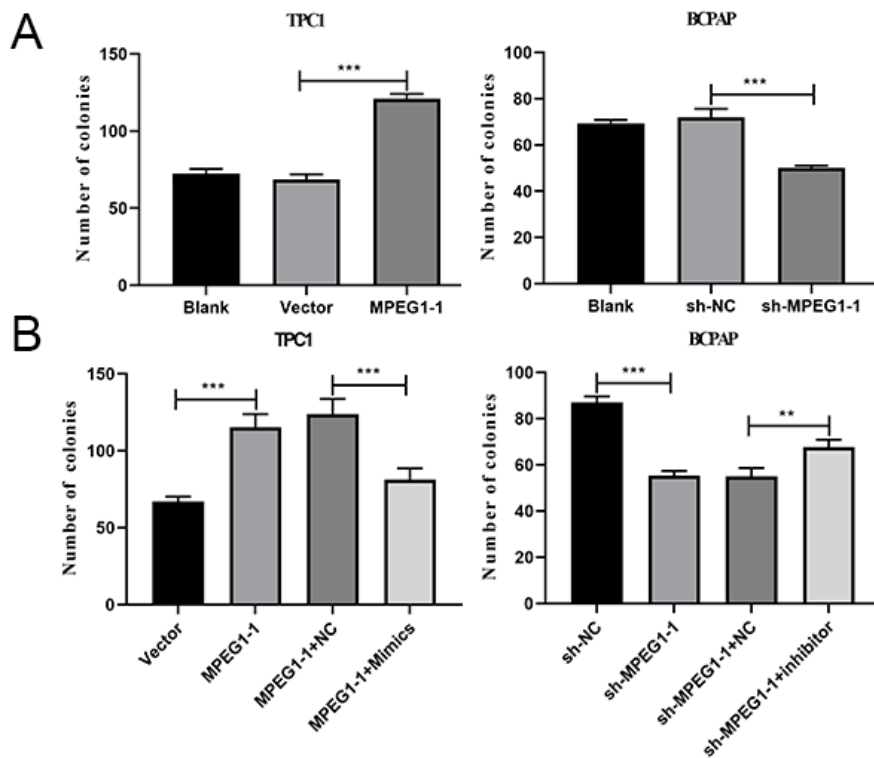

**Supplementary Figure 5 Cell vitality in each group was determined by colony number analysis.** (A) Colony number analysis was utilized to evaluate the colony-forming capacity of MPEG1-1-overexpressed on TPC1 cells and MPEG1-1-silenced on BCPAP cells. (B) The effect of MPEG1-1+mimics on TPC1 cell and sh-MPEG1-1+ inhibitor on BCPAP cells were analyzed by clone number analysis. All experiments were performed in triplicate and data are presented as the mean  $\pm$  SD. \*\* $p < 0.01$ ; \*\*\* $p < 0.001$ .

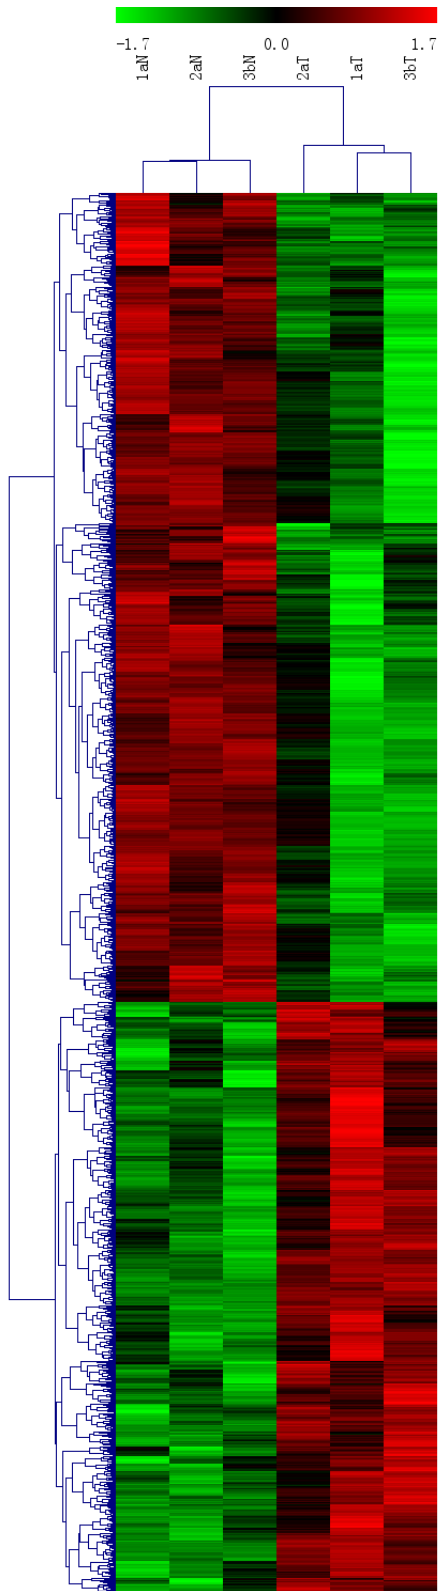

**Supplementary Figure 6 Hierarchical clustering revealed distinct lncRNA expression profiles between the samples detected by microarray in the discovery stage**
